# Supplementary material for: Omicron infection induces low-level, narrow-range SARS-CoV-2 neutralizing activity
Source: bioRxiv or medRxiv preprint supplement (doi:10.1101/2022.05.02.22274436), 2022-05-02

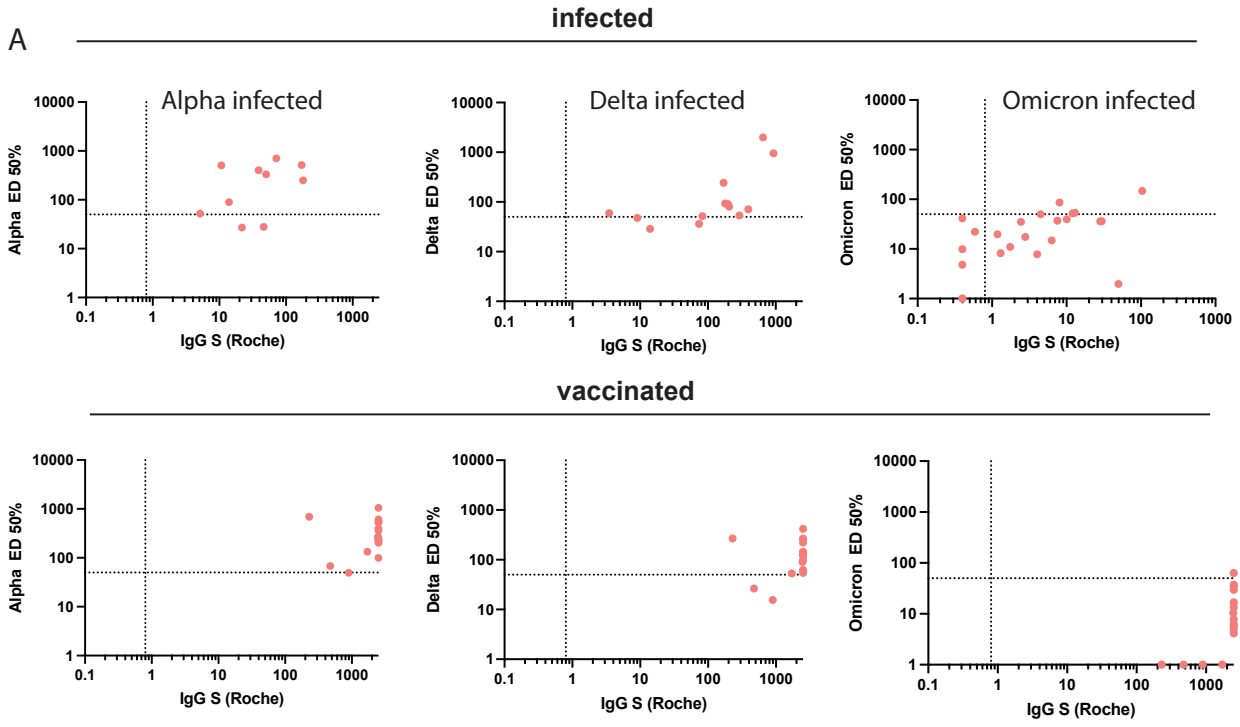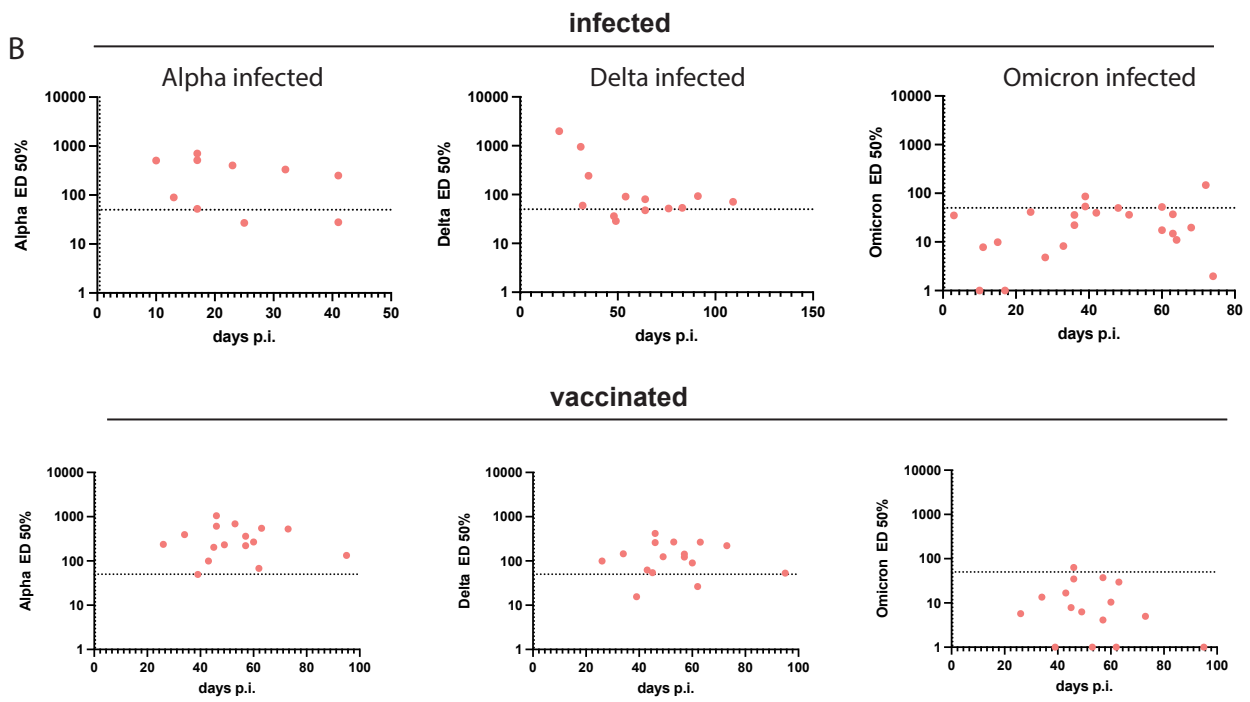

Supplement: Supplementary file [file media-1.pdf]
