# Supplementary material for: Omicron infection induces low-level, narrow-range SARS-CoV-2 neutralizing activity
Source: bioRxiv or medRxiv preprint supplement (doi:10.1101/2022.05.02.22274436), 2022-05-02

**A** Alpha isolate with Alpha-convalescents serums

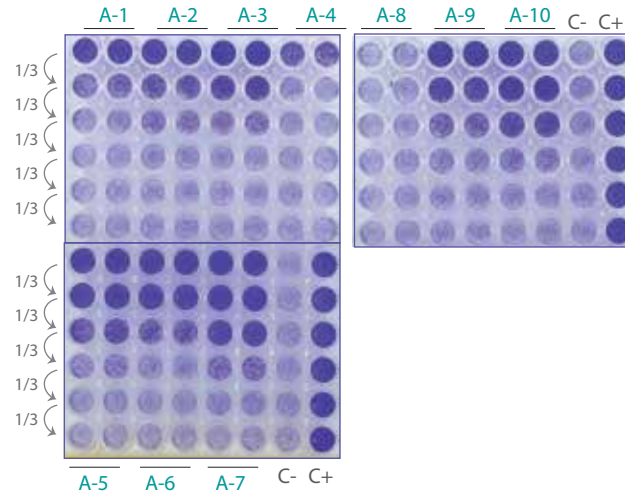

**B** Delta isolate with Delta-convalescents serums

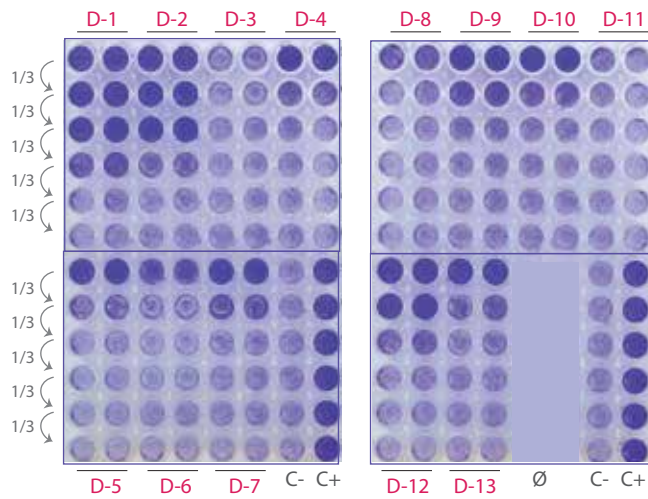

Supplement: Supplementary file [file media-2.pdf]
